# Supplementary material for: Global burden of lung cancer in adolescents and adults aged 15–45: analysis of the global burden of disease study (1990–2021)
Source: Front Med (Lausanne). 2025 Jun 25;12:1600662. doi: 10.3389/fmed.2025.1600662 (PMC12239874; doi:10.3389/fmed.2025.1600662)
Supplement: Supplementary file 2 [file Table_1.XLSX]

## Sheet: Sheet1
Supplementary Table 1| Age standardised mortality and DALYs of Lung Cancer in people aged 15-45 years old and their AAPCs at global and regional level,1990-2021
	Mortality(95% UI)					DALYs(95% UI)
	No of people with Lung Cancer in 1990	Age standardized rate in 1990(per 100 000)	No of people with Lung Cancer in 2021	Age standardized rate in 2021(per 100 000)	AAPC(95% CI)	No of people with Lung Cancer in 1990	Age standardized rate in 1990(per 100 000)	No of people with Lung Cancer in 2021	Age standardized rate in 2021(per 100 000)	AAPC(95% CI)
Global	47725.9	2.2	47169.7	1.3	-1.63	2.51295e+06	113.7	2473737	69.3	-1.6
	(44254.5 to 51498.1)	(2 to 2.3)	(42133 to 52208.5)	(1.2 to 1.5)	(-1.69 to -1.6)	(2326557.6 to 2714535)	(105.4 to 122.7)	(2210692.6 to 2736377.2)	(61.9 to 76.7)	(-1.68 to -1.5)
Sex：
Female	15284.5	1.4	17493.5	1	-1.17	811326	74.2	920183	52.1	-1.15
	(13502.3 to 17392)	(1.2 to 1.6)	(15348.9 to 20029)	(0.9 to 1.1)	(-1.24 to -1.1)	(716093.5 to 924081.9)	(65.6 to 84.4)	(806804.3 to 1053168.8)	(45.7 to 59.6)	(-1.25 to -1.1)
Male	32441.4	2.9	29676.2	1.6	-1.85	1.70163e+06	151.8	1.55355e+06	86.2	-1.83
	(29522.1 to 35939.3)	(2.7 to 3.2)	(25541.6 to 33881.9)	(1.4 to 1.9)	(-1.96 to -1.7)	(1547795.7 to 1888075.6)	(138.2 to 168.3)	(1337341.2 to 1772328.7)	(74.2 to 98.3)	(-1.93 to -1.7)
Age group(years)：
15-19	1080	0.2	739.2	0.1	-1.83	78618.3	15.1	53807.3	8.6	-1.82
	(978.4 to 1215)	(0.2 to 0.2)	(675.1 to 807.8)	(0.1 to 0.1)	(-1.93 to -1.7)	(71185.7 to 88404.1)	(13.7 to 17)	(49108 to 58825.3)	(7.9 to 9.4)	(-1.93 to -1.7)
20-24	1608.7	0.3	1323.5	0.2	-1.25	109309	22.2	89888.9	15.1	-1.25
	(1452 to 1779.3)	(0.3 to 0.4)	(1216.5 to 1434.2)	(0.2 to 0.2)	(-1.43 to -1.1)	(98639.6 to 120926.8)	(20 to 24.6)	(82648.9 to 97412.7)	(13.8 to 16.3)	(-1.44 to -1.1)
25-29	2588	0.6	2410.6	0.4	-1.17	163303	36.9	151889	25.8	-1.17
	(2370.7 to 2841.5)	(0.5 to 0.6)	(2186.3 to 2634.8)	(0.4 to 0.4)	(-1.48 to -0.9)	(149632.4 to 179310.2)	(33.8 to 40.5)	(137729.6 to 166109.6)	(23.4 to 28.2)	(-1.48 to -0.9)
30-34	5481.4	1.4	6196.6	1	-0.99	317900	82.5	359680	59.5	-0.99
	(5070.6 to 5924.9)	(1.3 to 1.5)	(5524.3 to 6854.3)	(0.9 to 1.1)	(-1.5 to -0.5)	(294139.7 to 343686.4)	(76.3 to 89.2)	(321114.4 to 397963)	(53.1 to 65.8)	(-1.49 to -0.5)
35-39	12551	3.6	11952.2	2.1	-1.69	666738	189.3	635755	113.4	-1.68
	(11608.3 to 13574.8)	(3.3 to 3.9)	(10638.4 to 13266.4)	(1.9 to 2.4)	(-1.89 to -1.5)	(616042.9 to 721181.6)	(174.9 to 204.7)	(565881.8 to 705878.9)	(100.9 to 125.9)	(-1.89 to -1.5)
40-45	24416.8	8.5	24547.7	4.9	-1.78	1.17709e+06	410.9	1.18272e+06	236.4	-1.78
	(22774.4 to 26162.7)	(7.9 to 9.1)	(21892.4 to 27211)	(4.4 to 5.4)	(-1.97 to -1.6)	(1096917.3 to 1261026)	(382.9 to 440.2)	(1054210 to 1310187.7)	(210.7 to 261.9)	(-1.99 to -1.6)
SDI level：
High	10472.6	2.4	5181.4	1	-2.73	537189	121.7	267580	52.8	-2.68
	(10169.1 to 10808.8)	(2.3 to 2.4)	(4908.1 to 5490.2)	(1 to 1.1)	(-2.85 to -2.6)	(521085.3 to 554985.2)	(118 to 125.7)	(253295.5 to 283873.5)	(50 to 56.1)	(-2.8 to -2.6)
High-middle	17208.7	3.6	13806	2.2	-1.62	902775	187.1	717071	113.7	-1.59
	(15506.6 to 19099.1)	(3.2 to 4)	(11711 to 16167.2)	(1.8 to 2.5)	(-1.77 to -1.5)	(812327.4 to 1002525.1)	(168.4 to 207.6)	(607878.8 to 839563.1)	(96.4 to 133.1)	(-1.77 to -1.4)
Middle	15785.3	2.3	18708.1	1.6	-1.11	844116	118.6	984116	84.6	-1.1
	(14017.8 to 17803.2)	(2 to 2.5)	(15731.5 to 21456.7)	(1.3 to 1.8)	(-1.23 to -1)	(749290.3 to 952550.1)	(105.3 to 133.8)	(828985.6 to 1127750)	(71.3 to 96.9)	(-1.24 to -1)
Low-middle	3425.2	0.8	7436.4	0.9	0.24	184668	43	396216	45.9	0.22
	(3024.6 to 3941.8)	(0.7 to 0.9)	(6591.3 to 8467.1)	(0.8 to 1)	(0.19 to 0.3)	(163005.6 to 212623)	(38 to 49.5)	(351114.4 to 452106.4)	(40.7 to 52.3)	(0.07 to 0.4)
Low	777.8	0.5	1998.9	0.5	0.05	41293.9	25.4	106727	25.9	0.07
	(641.6 to 995.8)	(0.4 to 0.6)	(1628.8 to 2460.9)	(0.4 to 0.6)	(-0.11 to 0.2)	(34021 to 52823.1)	(20.9 to 32.5)	(86917 to 131555.9)	(21.2 to 31.9)	(-0.08 to 0.2)
